# Supplementary material
Source: MDPI journal article supplement (https://www.mdpi.com/2227-9717/11/3/717)
Supplement: s1 [file s1]

**Supplementary Table S1.** This is a table. Gelling Agar agent replaced formulation (partially or fully) for *O. ficus-indica* or *O. robusta* hydrocolloids.

| Treatments | Agar | Mucilage | Pectin  | Treatments | Agar | Mucilage | Pectin |
|------------|------|----------|---------|------------|------|----------|--------|
| CT         | 0.8  | 0.0      | 0.0     | T9         | 0.0  | 0.0      | 0.8 OR |
| T1         | 0.0  | 0.0      | 0.8 OFI | T10        | 0.2  | 0.0      | 0.6 OR |
| T2         | 0.2  | 0.0      | 0.6 OFI | T11        | 0.4  | 0.0      | 0.4 OR |
| T3         | 0.4  | 0.0      | 0.4 OFI | T12        | 0.6  | 0.0      | 0.2 OR |
| T4         | 0.6  | 0.0      | 0.2 OFI | T13        | 0.0  | 0.8 OR   | 0.0    |
| T5         | 0.0  | 0.8 OFI  | 0.0     | T14        | 0.2  | 0.6 OR   | 0.0    |
| T6         | 0.2  | 0.6 OFI  | 0.0     | T15        | 0.4  | 0.4 OR   | 0.0    |
| T7         | 0.4  | 0.4 OFI  | 0.0     | T16        | 0.6  | 0.2 OR   | 0,0    |
| T8         | 0.6  | 0.2 OFI  | 0.0     |            |      |          |        |

\* *Opuntia ficus-indica* (OFI), *Opuntia robusta* (OR). (50 ml = 0.40 g of Agar 0.8 % w/v), CT: Control treatment.
